# Supplementary material for: High Adherence to a Mediterranean Alcohol-Drinking Pattern and Mediterranean Diet Can Mitigate the Harmful Effect of Alcohol on Mortality Risk
Source: MDPI journal article supplement (doi:10.3390/nu16010059), 2023-12-24
Supplement: s1 [file s1]

## Supplementary tables

Supplementary Table 1. Baseline Characteristics of Participants by Food Frequency Questionnaire. MICOL/PANEL Castellana Grotte (BA) and NUTRIHEP Studies, Putignano (BA), Italy, 2005-2022

|                                       | FFQ            |                |
|---------------------------------------|----------------|----------------|
|                                       | Yes            | No             |
| N                                     | 3411           | 366            |
| Age at enrollment (yrs) *             | 50.98 (16.01)  | 45.56 (15.55)  |
| DBP (mmHg)*                           | 124.98 (16.98) | 122.56 (16.27) |
| SBP (mmHg)*                           | 77.59 (9.39)   | 77.76 (9.56)   |
| Weight (kg)*                          | 72.98 (14.52)  | 72.16 (16.83)  |
| BMI (kg/m <sup>2</sup> )*             | 27.13 (4.80)   | 26.59 (5.54)   |
| Triglycerides (mmol/L)*               | 1.38 (0.98)    | 1.27 (0.95)    |
| Total Cholesterol (mmol/L)*           | 5.12 (1.02)    | 4.98 (0.96)    |
| HDL (mmol/L)*                         | 1.34 (0.35)    | 1.34 (0.34)    |
| LDL (mmol/L)*                         | 3.16 (0.87)    | 3.05 (0.88)    |
| Glucose (mmol/L)*                     | 5.84 (1.34)    | 5.87 (1.53)    |
| ALT (μkat/L)*                         | 0.27 (0.21)    | 0.26 (0.19)    |
| Sex***                                |                |                |
| Female                                | 1464 (42.9)    | 188 (51.47)    |
| Male                                  | 1947 (57.1)    | 178 (48.36)    |
| Smoke***                              |                |                |
| Never/Former                          | 2823 (82.8)    | 210 (73.94)    |
| Current                               | 588 (17.2)     | 74 (26.06)     |
| Education***                          |                |                |
| Primary School                        | 1021 (29.9)    | 44 (18.49)     |
| Secondary School                      | 1061 (31.1)    | 82 (34.45)     |
| High School                           | 1005 (29.5)    | 86 (36.13)     |
| Graduated                             | 324 (9.5)      | 26 (10.92)     |
| Job***                                |                |                |
| Managers & Professionals              | 216 (6.3)      | 17 (6.30)      |
| Craft. Agricultural and Sales Workers | 814 (23.9)     | 81 (34.03)     |
| Elementary Occupations                | 799 (23.4)     | 56 (23.53)     |
| Housewife                             | 415 (12.2)     | 23 (9.66)      |
| Pensioneers                           | 1164 (34.2)    | 36 (15.13)     |
| Jobless                               | 216 (6.3)      | 25 (10.50)     |
| Marital Status***                     |                |                |
| Single                                | 561 (16.4)     | 44 (12.32)     |
| Married/Coupled                       | 2611 (76.5)    | 129 (36.13)    |
| Separated/Divorced                    | 73 (2.1)       | 3(0.84)        |
| Widower                               | 166 (4.9)      | 5 (1.40)       |

ALT: Alanine Aminotransferase; BMI: Body Mass Index; DBP: Diastolic Blood Pressure; SBP Systolic Blood Pressure; HDL: High-Density Lipoprotein Cholesterol; LDL: Low-Density Lipoprotein Cholesterol; Cells reporting subject characteristics contain \* Mean±(SD). \*\*\*Number (Percentage) Percentages calculated per column

Supplementary Table 2. Characteristics of Participants by Mediterranean Alcohol Drinking Pattern Score Categories. MICOL/PANEL Studies. Castellana Grotte, (BA), Italy, 2005-2022

|                                    | Mediterranean Alcohol Drinking Pattern |                     |                     | <i>p-value</i> |
|------------------------------------|----------------------------------------|---------------------|---------------------|----------------|
|                                    | High (7-9)                             | Moderate (4-6)      | Low (0-3)           |                |
| N***                               | 1094 (70.5)                            | 398 (25.6)          | 61 (3.9)            |                |
| Age at enrollment (yrs) *          | 57.69 (14.99)                          | 51.36 (13.24)       | 55.70 (12.49)       | <0.001         |
| DBP (mmHg)*                        | 125.32 (19.44)                         | 123.35 (19.48)      | 129.97 (20.36)      | 0.030          |
| SBP (mmHg)*                        | 74.66 (10.14)                          | 76.21 (9.81)        | 77.60 (9.99)        | 0.005          |
| Weight (kg)*                       | 75.58 (14.30)                          | 77.87 (14.78)       | 80.67 (12.15)       | 0.001          |
| BMI (kg/m <sup>2</sup> )*          | 28.57 (4.72)                           | 28.71 (4.91)        | 29.12 (3.91)        | 0.63           |
| Kcal days*                         | 2262.11 (677.61)                       | 2503.60 (702.20)    | 2855.34 (754.18)    | <0.001         |
| Triglycerides (mmol/L)*            | 1.47 (0.95)                            | 1.60 (1.23)         | 1.59 (1.15)         | 0.11           |
| Total Cholesterol (mmol/L)*        | 5.20 (0.98)                            | 5.29 (1.05)         | 5.53 (1.07)         | 0.020          |
| HDL (mmol/L)*                      | 1.31 (0.34)                            | 1.33 (0.34)         | 1.49 (0.53)         | <0.001         |
| LDL (mmol/L)*                      | 3.22 (0.84)                            | 3.24 (0.87)         | 3.28 (0.94)         | 0.80           |
| Glucose (mmol/L)*                  | 6.07 (1.37)                            | 6.17 (1.71)         | 6.27 (1.13)         | 0.33           |
| ALT (μkat/L)*                      | 0.29 (0.28)                            | 0.30 (0.18)         | 0.34 (0.15)         | 0.20           |
| Wine consumption (g alcohol/d) *   | 18.88 (10.57)                          | 33.29 (27.95)       | 55.42 (21.09)       | <0.001         |
| Beer consumption (g alcohol/d) *   | 0.83 (2.41)                            | 3.91 (5.18)         | 14.64 (4.44)        | <0.001         |
| Spirit consumption (g alcohol/d) * | 0.65 (1.30)                            | 2.12 (3.91)         | 5.15 (6.84)         | <0.001         |
| Sex***                             |                                        |                     |                     |                |
| Female                             | 323 (75.5)                             | 104 (24.3)          | 1 (0.2)             | <0.001         |
| Male                               | 771 (68.5)                             | 294 (26.1)          | 60 (5.3)            |                |
| Smoke***                           |                                        |                     |                     |                |
| Never/Former                       | 933 (74.6)                             | 279 (22.3)          | 38 (3.0)            | <0.001         |
| Current                            | 161 (53.1)                             | 119 (39.3)          | 23 (7.6)            |                |
| CCI**                              | 40 (2-5)                               | 3 (1-5)             | 4 (3-6)             | <0.001         |
| rMED**                             | 8 (7-10)                               | 7 (6-8)             | 7 (6-8)             | <0.001         |
| Age at Death (yrs) **              | 74.41 (61.06-83.47)                    | 67.32 (56.57-77.52) | 72.74 (61.05-78.69) | <0.001         |
| Observation time** (yrs)           | 16.94 (15.07-17.42)                    | 16.94 (16.13-17.29) | 16.93 (14.79-17.30) | 0.27           |
| Status***                          |                                        |                     |                     |                |
| Alive and/or Censored              | 775 (67.7)                             | 329 (28.7)          | 41 (3.6)            | <0.001         |
| Dead                               | 319 (78.2)                             | 69 (16.9)           | 20 (4.9)            |                |
| Cause of Death***                  |                                        |                     |                     |                |
| CVD                                | 100 (81.3)                             | 19 (15.4)           | 4 (3.3)             | 0.020          |
| Cr                                 | 52 (72.2)                              | 13 (18.1)           | 7 (9.7)             |                |
| DS                                 | 36 (65.5)                              | 13 (23.6)           | 6 (10.9)            |                |
| DOC                                | 131 (82.9)                             | 24 (15.2)           | 3 (1.9)             |                |
| Education***                       |                                        |                     |                     |                |
| Primary School                     | 364 (70.1)                             | 137 (26.4)          | 18 (3.5)            | 0.40           |
| Secondary School                   | 358 (69.2)                             | 134 (25.9)          | 25 (4.8)            |                |
| High School                        | 249 (70.3)                             | 95 (26.8)           | 10 (2.8)            |                |
| Graduated                          | 123 (75.5)                             | 32 (19.6)           | 8 (4.9)             |                |
| Job***                             |                                        |                     |                     |                |
| Managers & Professionals           | 40 (59.7)                              | 23 (34.3)           | 4 (6.0)             | 0.002          |
| Craft. Agricultural and Sales      |                                        |                     |                     |                |
| Workers                            | 246 (63.4)                             | 122 (31.4)          | 20 (5.2)            |                |
| Elementary Occupations             | 282 (71.0)                             | 105 (26.4)          | 10 (2.5)            |                |
| Housewife                          | 96 (73.8)                              | 26 (20.0)           | 8 (6.2)             |                |
| Pensioneers                        | 415 (76.0)                             | 113 (20.7)          | 18 (3.3)            |                |
| Jobless                            | 15 (60.0)                              | 9 (36.0)            | 1 (4.0)             |                |
| Marital Status***                  |                                        |                     |                     |                |
| Single                             | 98 (67.6)                              | 45 (31.0)           | 2 (1.4)             | <0.001         |

|                    |            |            |          |
|--------------------|------------|------------|----------|
| Married/Coupled    | 880 (70.2) | 322 (25.7) | 51 (4.1) |
| Separated/Divorced | 22 (50.0)  | 18 (40.9)  | 4 (9.1)  |
| Widower            | 94 (84.7)  | 13 (11.7)  | 4 (3.6)  |

---

DBP: Diastolic Blood Pressure; SBP: Systolic Blood pressure; BMI: Body Mass Index; HDL: High-Density Lipoprotein Cholesterol; LDL: Low-Density Lipoprotein Cholesterol; GPT: Glutamate Pyruvate Transaminase Alanine Aminotransferase; CCI: Comorbidity Charlson Index; rMED Relative Mediterranean Score CVD: Cardiovascular Disease; Cr: Cancer deaths; DS: Digestive System deaths; DOC: Deaths from Other Cells reporting subject characteristics contain \* Mean $\pm$ (SD). \*\*Median (IQR). \*\*\*Number. (Percentage) Percentages calculated per row.

Supplementary Table 3. Characteristics of Participants by Mediterranean Alcohol Drinking Pattern Score Categories. NUTRIHEP Study. Putignano (BA). Italy. 2005-2022

|                                  | Mediterranean Alcohol Drinking Pattern |                     |                     | <i>p-value</i> |
|----------------------------------|----------------------------------------|---------------------|---------------------|----------------|
|                                  | High (7-9)                             | Moderate (4-6)      | Low (0-3)           |                |
| N***                             | 716 (38.6)                             | 1110 (59.7)         | 32 (1.7)            |                |
| Age at enrollment (yrs) *        | 50.37 (15.53)                          | 44.44 (15.69)       | 48.33 (13.67)       | <0.001         |
| DBP (mmHg)*                      | 127.31 (15.05)                         | 123.33 (13.78)      | 129.84 (14.00)      | <0.001         |
| SBP (mmHg)*                      | 80.95 (8.18)                           | 78.80 (8.10)        | 82.81 (6.71)        | <0.001         |
| Weight (kg)*                     | 70.32 (13.49)                          | 69.70 (14.17)       | 82.37 (14.03)       | <0.001         |
| BMI (kg/m <sup>2</sup> )*        | 26.04 (4.15)                           | 25.71 (4.68)        | 28.33 (3.79)        | 0.002          |
| Kcal days*                       | 2017.86 (664.40)                       | 2048.15 (725.45)    | 2838.01 (835.52)    | <0.001         |
| Triglycerides (mmol/L)*          | 1.33 (0.94)                            | 1.21 (0.87)         | 1.65 (1.10)         | 0.002          |
| Total Cholesterol (mmol/L)*      | 5.15 (0.99)                            | 4.94 (1.05)         | 5.23 (0.74)         | <0.001         |
| HDL (mmol/L)*                    | 1.36 (0.35)                            | 1.35 (0.34)         | 1.26 (0.32)         | 0.19           |
| LDL (mmol/L)*                    | 3.20 (0.87)                            | 3.04 (0.90)         | 3.26 (0.73)         | <0.001         |
| Glucose (mmol/L)*                | 5.72 (1.23)                            | 5.54 (1.14)         | 6.20 (1.59)         | <0.001         |
| ALT (μkat/L)*                    | 0.25 (0.13)                            | 0.25 (0.18)         | 0.43 (0.30)         | <0.001         |
| Wine consumption (g alcohol/d)   |                                        |                     |                     |                |
| *                                | 12.79 (10.95)                          | 5.35 (11.66)        | 43.72 (19.46)       | <0.001         |
| Beer consumption (g alcohol/d) * | 0.62 (1.11)                            | 1.89 (4.00)         | 15.37 (11.70)       | <0.001         |
| Spirit consumption (g alcohol/d) |                                        |                     |                     |                |
| *                                | 0.88 (1.98)                            | 1.13 (2.70)         | 10.00 (11.64)       | <0.001         |
| Sex***                           |                                        |                     |                     |                |
| Female                           | 378 (36.5)                             | 655 (63.2)          | 3 (0.3)             | <0.001         |
| Male                             | 338 (41.1)                             | 455 (55.4)          | 29 (3.5)            |                |
| Smoke***                         |                                        |                     |                     |                |
| Never/Former                     | 617 (39.2)                             | 937 (59.6)          | 19 (1.2)            | <0.001         |
| Current                          | 99 (34.7)                              | 173 (60.7)          | 13 (4.6)            |                |
| CCI**                            | 2 (1-4)                                | 1 (0-3)             | 3 (1-5)             | <0.001         |
| rMED**                           | 9 (6-11)                               | 9 (6-11)            | 6 (4-8.50)          | 0.003          |
| Age at Death (yrs) **            | 67.15 (54.77-77.25)                    | 59.51 (48.02-72.50) | 65.57 (54.96-73.78) | <0.001         |
| Observation time** (yrs)         | 16.66 (16.12-16.87)                    | 16.70 (16.17-16.85) | 16.59 (16.11-16.85) | 0.95           |
| Status***                        |                                        |                     |                     |                |
| Alive and/or Censored            | 631 (37.7)                             | 1.016 (60.7)        | 27 (1.6)            | 0.033          |
| Dead                             | 85 (46.2)                              | 94 (51.1)           | 5 (2.7)             |                |
| Cause of Death***                |                                        |                     |                     |                |
| CVD                              | 26 (50.0)                              | 25 (48.1)           | 1 (1.9)             | 0.857          |
| Cr                               | 19 (48.7)                              | 18 (46.2)           | 2 (5.1)             |                |
| DS                               | 13 (46.4)                              | 14 (50.0)           | 1 (3.6)             |                |
| DOC                              | 27 (41.5)                              | 37 (56.9)           | 1 (1.5)             |                |
| Education***                     |                                        |                     |                     |                |
| Primary School                   | 227 (45.2)                             | 266 (53.0)          | 9 (1.8)             | <0.001         |
| Secondary School                 | 205 (37.7)                             | 326 (59.9)          | 13 (2.4)            |                |
| High School                      | 214 (32.9)                             | 427 (65.6)          | 10 (1.5)            |                |
| Graduated                        | 70 (43.5)                              | 91 (56.5)           | 0 (0.0)             |                |
| Job***                           |                                        |                     |                     |                |
| Managers & Professionals         | 56 (37.6)                              | 89 (59.7)           | 4 (2.7)             | <0.001         |
| Craft. Agricultural and Sales    |                                        |                     |                     |                |
| Workers                          | 155 (36.4)                             | 262 (61.5)          | 9 (2.1)             |                |
| Elementary Occupations           | 147 (36.6)                             | 246 (61.2)          | 9 (2.2)             |                |
| Housewife                        | 104 (36.5)                             | 181 (63.5)          | 0 (0.0)             |                |
| Pensioneers                      | 204 (51.8)                             | 182 (46.2)          | 8 (2.0)             |                |
| Jobless                          | 49 (24.6)                              | 148 (74.4)          | 2 (1.0)             |                |

Marital Status\*\*\*

|                    |            |            |          |        |
|--------------------|------------|------------|----------|--------|
| Single             | 114 (27.4) | 299 (71.9) | 3 (0.7)  | <0.001 |
| Married/Coupled    | 571 (42.0) | 760 (56.0) | 27 (2.0) |        |
| Separated/Divorced | 6 (20.7)   | 22 (75.9)  | 1 (3.4)  |        |
| Widower            | 25 (45.5)  | 29 (52.7)  | 1 (1.8)  |        |

---

DBP: Diastolic Blood Pressure; SBP: Systolic Blood pressure; BMI: Body Mass Index; HDL: High-Density Lipoprotein Cholesterol; LDL: Low-Density Lipoprotein Cholesterol; GPT: Glutamate Pyruvate Transaminase AlanineAminotransferase; CCI: Comorbidity Charlson Index; rMED Relative Mediterranean Score CVD: Cardiovascular Disease; Cr: Cancer deaths; DS: Digestive System deaths; DOC: Deaths from Other Cells reporting subject characteristics contain \* Mean±(SD). \*\*Median (IQR). \*\*\*Number. (Percentage) Percentages calculated per row.

Supplementary Table 4. Distribution of participants by scoring criteria of Mediterranean Alcohol Drinking Pattern score components.

| Item                                                                | Score | Mediterranean Alcohol Drinking Pattern |                   |               |
|---------------------------------------------------------------------|-------|----------------------------------------|-------------------|---------------|
|                                                                     |       | Low<br>n (%)                           | Moderate<br>n (%) | High<br>n (%) |
| Moderate alcohol intake (g/d)                                       |       |                                        |                   |               |
| High intake: F>25 g/d; M>50 g/d                                     | 0     | 93 (26.8)                              | 254 (73.2)        | 0 (0.0)       |
| Low intake: F >0-5 g/d; M>0-10 g/d                                  | 1     | 0 (0.0)                                | 930 (77.2)        | 274 (22.8)    |
| Moderate intake: F 5-25 g/d; M 10-50 g/d                            | 2     | 0 (0.0)                                | 324 (17.4)        | 1.536 (82.6)  |
| Alcohol consumption spread out over the week (d/week: week ratio)   |       |                                        |                   |               |
| Not distributed:in Q1                                               | 0     | 93 (10.3)                              | 480 (53.1)        | 331 (36.6)    |
| Moderately distributed: in Q2-Q3                                    | 1     | 0 (0.0)                                | 830 (42.6)        | 1.120 (57.4)  |
| Evenly distributed: in Q4                                           | 2     | 0 (0.0)                                | 198 (35.5)        | 359 (64.5)    |
| Low spirit consumption<br>(alcohol from spirit/total alcohol)       |       |                                        |                   |               |
| High spirit consumption: $\geq 25\%$                                | 0     | 1 (0.4)                                | 242 (98.4)        | 3 (1.2)       |
| Low spirit consumption: $< 25\%$                                    | 1     | 92 (2.9)                               | 1.266 (40.0)      | 1.807 (57.1)  |
| Wine preference<br>(alcohol from wine/total alcohol)                |       |                                        |                   |               |
| No wine preference: $< 75\%$                                        | 0     | 88 (5.6)                               | 1.215 (77.0)      | 275 (17.4)    |
| Wine preference $\geq 75\%$                                         | 1     | 5 (0.3)                                | 293 (16.0)        | 1.535 (83.7)  |
| Wine consumed preferably with meals<br>(wine with meals/total wine) |       |                                        |                   |               |
| Out of meals $< 75\%$                                               | 0     | 0 (0.0)                                | 0 (0.0)           | 0 (0.0)       |
| Preferably with meals $\geq 75\%$                                   | 1     | 93 (2.7)                               | 1.508 (44.2)      | 1.810 (53.1)  |
| Preference for red wine over types of wine<br>(red wine/total wine) |       |                                        |                   |               |
| No red wine preference $< 75\%$                                     | 0     | 12 (3.4)                               | 308 (86.0)        | 38 (10.6)     |
| Red wine preference $\geq 75\%$                                     | 1     | 81 (2.7)                               | 1.200 (39.3)      | 1.772 (58.0)  |
| No excess consumption<br>(maximum drinks on a single occasion)      |       |                                        |                   |               |
| Any excess: $> 5$ drinks on a single occasion                       | 0     | 91 (41.9)                              | 126 (58.1)        | 0 (0.0)       |
| No excess: $\leq 5$ drinks on a single occasion                     | 1     | 2 (0.1)                                | 1.382 (43.3)      | 1.810 (56.7)  |

Table S5 Mortality Hazard Ratios (HR) and Subdistribution Hazard Ratios (SHR) according to the categories of the Mediterranean Alcohol-drinking pattern (MADP)

|                  | MADP              |                    |
|------------------|-------------------|--------------------|
|                  | Moderate (4-6)    | Low (0-3)          |
|                  | HR (95% CI)       | HR (95% CI)        |
| All causes Death | 1.09 (0.89; 1.34) | 1.46 (0.93; 2.28)  |
|                  | SHR (95% CI)      | SHR (95% CI)       |
| CVD              | 1.08 (0.74; 1.58) | 0.81 (0.30; 2.18)  |
| Cr               | 1.06 (0.74; 1.51) | 2.70**(1.51; 4.83) |
| DOC              | 1.17 (0.84; 1.62) | 0.62 (0.23; 1.65)  |

High Adherence: referent category; \**p*value<0.05 \*\**p*value<0.001. Model adjusted for sex (F vs M), Body Mass Index (<25 vs ≥25), Alanine Amine Transferase (<40 U/l vs ≥40 U/l), Triglycerides (<150 mg/L vs ≥150 mg/L), Comorbidity Charlson Index, **smoking habits and Job**. HR: Hazard Ratio; SHR: Subdistribution Hazard Ratio; CVD Cardiovascular Disease; Cr: Cancer DOC: Other Causes of Death

Table S6. Mortality Hazard Ratios (HR) and Subdistribution Hazard Ratios (SHR) according to the categories of the Relative Mediterranean Score without alcohol consumption (rMEDNA)

|                  | rMEDNA            |                   |
|------------------|-------------------|-------------------|
|                  | Moderate (4-6)    | Low (0-3)         |
|                  | HR (95% CI)       | HR (95% CI)       |
| All causes Death | 1.13 (0.90; 1.43) | 1.27 (0.96; 1.68) |
|                  | SHR (95% CI)      | SHR (95% CI)      |
| CVD              | 0.98 (0.65; 1.46) | 0.83 (0.50; 1.46) |
| Cancer           | 1.49 (0.96; 2.30) | 1.66(0.95; 2.58)  |
| DOC              | 1.15 (0.77; 1.70) | 1.37 (0.86; 2.18) |

High Adherence: referent category; Model adjusted for sex (F vs M), Body Mass Index (<25 vs ≥25), Alanine Amine Transferase (<40 U/L vs ≥40 U/L), Triglycerides (<150 mg/L vs ≥150 mg/L), Comorbidity Charlson Index, **smoking habits and Job**. HR: Hazard Ratio; SHR: Subdistribution Hazard Ratio; CVD Cardiovascular Disease; Cr: Cancer DOC: Other Causes of Death

Table S7 Mortality Hazard Ratios (HR) and Subdistribution Hazard Ratios (SHR) according to the categories of the MADP+rMED No Alcohol

|                   | All causes         | CVD               | Cancer             | OCD               |
|-------------------|--------------------|-------------------|--------------------|-------------------|
|                   | HR (95% CI)        | SHR (95% CI)      | SHR (95% CI)       | SHR (95% CI)      |
| MADP#rMEDNA       |                    |                   |                    |                   |
| High High         | 1.00               | 1.00              | 1.00               | 1.00              |
| High Moderate     | 1.24 (0.93; 1.65)  | 1.13 (0.69; 1.86) | 1.44 (0.85; 2.48)  | 1.27 (0.82; 1.99) |
| High Low          | 1.26 (0.87; 1.22)  | 0.84 (0.43; 1.66) | 1.27 (0.65; 2.48)  | 1.39 (0.81; 2.39) |
| Moderate High     | 1.37 (0.90; 2.08)  | 1.44 (0.70; 2.99) | 1.06 (0.47; 2.37)  | 1.72 (0.89; 3.31) |
| Moderate Moderate | 1.17 (0.82; 1.66)  | 1.01 (0.54; 1.89) | 1.30 (0.69; 2.44)  | 1.31 (0.76; 2.25) |
| Moderate Low      | 1.50* (1.01; 2.23) | 1.12 (0.54; 2.37) | 1.86(0.95; 3.67)   | 1.40 (0.74; 2.66) |
| Low High          | 0.57 (0.08; 4.12)  | 1.72 (0.23; 12.9) | NE                 | NE                |
| Low Moderate      | 1.78 (0.97; 3.27)  | 0.81 (0.17; 2.98) | 4.10**(1.81; 9.27) | 0.62 (0.15; 2.58) |
| Low Low           | 2.29* (1.04; 5.04) | 0.77 (0.11; 5.47) | 3.85*(1.29; 11.5)  | 1.24 (0.31; 4.89) |

\**p*value<0.05 \*\**p*value<0.001. Model adjusted for sex (F vs M), Body Mass Index (<25 vs ≥25), Alanine Amine Transferase (<40 U/L vs ≥40 U/L), Triglycerides (<150 mg/L vs ≥150 mg/L), Comorbidity Charlson Index, smoking habits and Job. HR: Hazard Ratio; SHR: Subdistribution Hazard Ratio; rMEDNA: Relative Mediterranean Score without alcohol consumption. CVD Cardiovascular Disease; OCD: Other Causes of Death; NE: Not Estimable



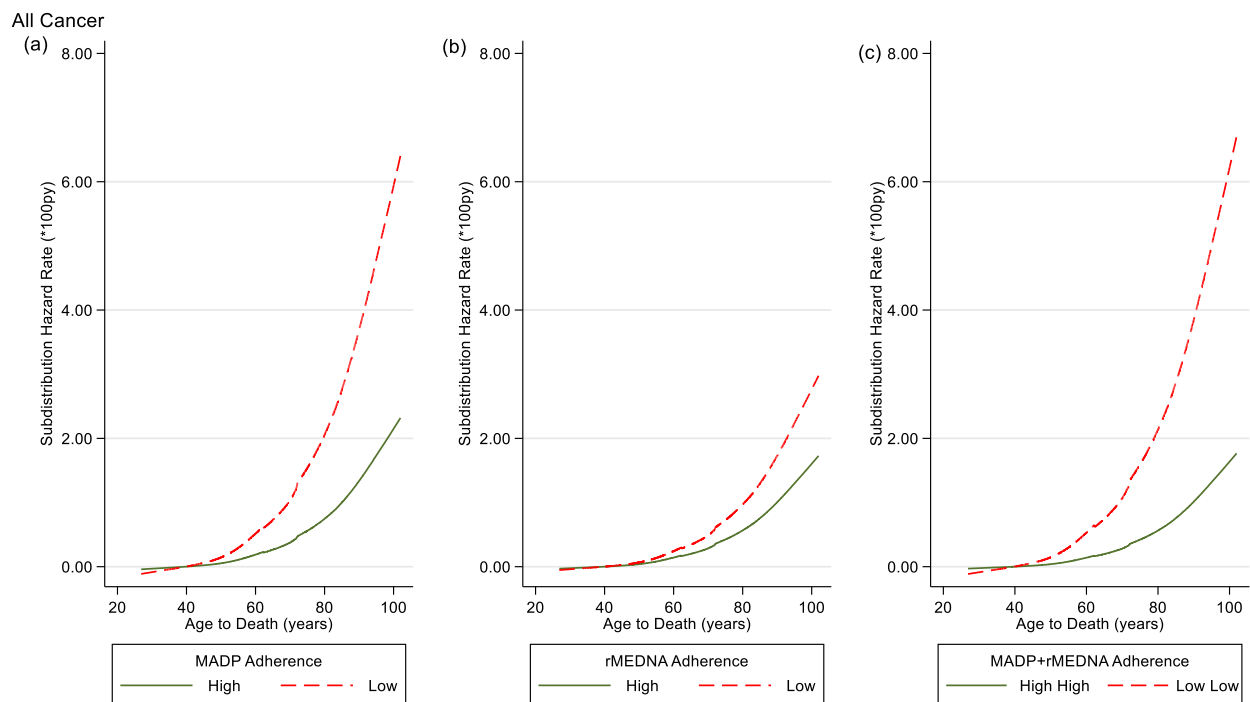

MADP: Mediterranean Alcohol Drinking Pattern; rMEDNA: Relative Mediterranean Diet Score without Alcohol consumption; py: person years

Figure S1: Subdistribution Hazard Rates for all causes of Death by (a) MADP, (b) rMEDNA, (c) MADP+rMEDNA
